# Supplementary material for: Relationship between heart failure and the risk of acute exacerbation of COPD
Source: PubMed Central journal article supplement — Thorax. 2021 Apr 29;76(8):807–14. doi: 10.1136/thoraxjnl-2020-216390 (PMC8311079; doi:10.1136/thoraxjnl-2020-216390), 2021-04-29
Supplement: thoraxjnl-2020-216390supp001.pdf [file thoraxjnl-2020-216390supp001.pdf]

### Online Data Supplement

Axson EL, Bottle A, Cowie MC, and Quint JK. The relationship between heart failure and the risk of acute exacerbation of COPD.

**Read codes used to identify HF in CPRD GOLD**

|         |         |         |
|---------|---------|---------|
| G580.00 | G5yyA00 | G583.12 |
| G581.00 | G581000 | G583.11 |
| G58..00 | 662p.00 | G580400 |
| G580.11 | G580100 | 8CMW800 |
| 9N0k.00 | 8CL3.00 | G21z100 |
| G5yy900 | 585g.00 | G232.00 |
| G58z.00 | 8B29.00 | G211100 |
| 8HBE.00 | G580200 | G234.00 |
| 662T.00 | G5yyD00 | 8CeC.00 |
| 662W.00 | 8CMK.00 | G210100 |
| G58..11 | G58z.12 | SP11111 |
| 1O1..00 | G580000 | G1yz100 |
| 662g.00 | G582.00 | G580.14 |
| 585f.00 | Zrad.00 | G580.12 |
| G581.13 | 662i.00 | G580.13 |
| 33BA.00 | G583.00 | G584.00 |
| 662f.00 | 8H2S.00 | G41z.11 |
| 662h.00 | G580300 | G400.00 |

### Results of Sensitivity Analyses

Keeping patients with chronic kidney and liver disease, COPD patients with a diagnosis of HF experienced greater risk for moderate-to-severe AECOPD (aHR = 1.47, 95%CI: 1.32, 1.63) compared to COPD patients without a diagnosis of HF.

COPD patients with possible HF who had no evidence of ever being investigated for HF experienced greater risk for moderate-to-severe AECOPD (aHR = 1.27, 95%CI: 1.18, 1.38) compared to COPD patients with possible HF with evidence of ever being investigated for HF. COPD patients with possible HF with evidence of ever being investigated for HF still experienced greater risk for moderate-to-severe AECOPD (aHR = 1.54, 95%CI: 1.43, 1.65) than COPD patients with no evidence of HF.

Classifying COPD patients with a HF hospitalisation during follow-up, but no HF diagnosis recorded in primary, as having a HF diagnosis made 449 possible HF patients become prevalent HF patients prior to the start of follow-up and made 532 possible HF patients become newly diagnosed HF patients during follow-up. Patients were then matched according to their new status and regression performed per the methods.

Compared to COPD patients without evidence of HF, COPD patients with newly diagnosed HF (including patients with HF hospitalisation during follow-up, but no primary care HF diagnosis) experienced greater risk for moderate-to-severe AECOPD (aHR = 1.63, 95%CI: 1.49, 1.79). This estimate is larger than that seen in the main analysis. The new definition by its nature shifted more symptomatic and sicker individuals into the newly diagnosed HF category and that would increase AECOPD risk.

Compared to COPD patients without evidence of HF, COPD patients with possible HF (excluding patients with history of HF hospitalisation or HF hospitalisation during follow-up, but no primary care diagnosis) experienced a greater risk for moderate-to-severe AECOPD (aHR = 1.69, 95%CI: 1.61, 1.76). The risk for moderate-to-severe AECOPD was not affected by the new categories compared to the main analysis.

|                                                                                                    | Possible HF<br>N = 8,476     | Newly Diagnosed HF<br>N = 2,066 |
|----------------------------------------------------------------------------------------------------|------------------------------|---------------------------------|
| <b>Median length of time on LDs before end of follow-up or HF diagnosis</b>                        | 1.85 years (IQR: 0.90, 3.81) | 0.50 years (IQR: 0.11, 2.12)    |
| <b>History of HF hospitalisation (n, %)</b><br>HF as primary or secondary diagnostic code          | 981 (11.6)                   | 692 (33.5)                      |
| Median time between most recent HF hospitalisation and end of follow-up or HF diagnosis            | 1.68 years (IQR: 0.42, 4.13) | 1.00 year (IQR: 0.72, 1.04)     |
| <b>History of echocardiography (n, %)</b>                                                          | 3,569 (42.1)                 | 1,854 (89.7)                    |
| Median time between most recent echocardiography and end of follow-up or HF diagnosis              | 2.76 years (IQR: 1.18, 5.28) | 1.00 year (IQR: 0.83, 1.15)     |
| <b>History of BNP test (n, %)</b>                                                                  | 1,480 (17.5)                 | 425 (20.6)                      |
| Median time between most recent BNP test and end of follow-up or HF diagnosis                      | 1.78 (IQR: 0.81, 3.18)       | 1.08 years (IQR: 1.00, 1.31)    |
| <b>History of an outpatient cardiology visit (n, %)</b>                                            | 1,249 (14.7)                 | 435 (21.1)                      |
| Median time between most recent outpatient cardiology visit and end of follow-up or HF diagnosis   | 1.93 years (IQR: 0.67, 4.63) | 2.98 years (IQR: 1.54, 4.99)    |
| <b>History of HF investigation: echocardiography, BNP test, and/or outpatient cardiology visit</b> | 4,545 (53.6)                 | 1,898 (91.9)                    |

Table E1. Proportion of chronic obstructive pulmonary disease (COPD) patients with possible heart failure (HF) and newly diagnosed HF with a history of hospitalisation due to HF, a history of echocardiography, a history of brain natriuretic peptide (BNP) measures, and/or a history of an outpatient cardiology visit and the median (interquartile range, IQR) time between the most recent of these and the end of follow-up or HF diagnosis.

|                                      | COPD patients without evidence of HF | COPD patients with diagnosed HF |                                                      | COPD patients without evidence of HF | COPD patients with diagnosed HF |
|--------------------------------------|--------------------------------------|---------------------------------|------------------------------------------------------|--------------------------------------|---------------------------------|
| <b>Number of Patients (N)</b>        | 4,132                                | 2,066                           | <b>Exacerbation History*</b>                         | 1 (0, 2)                             | 2 (1, 4)                        |
| <b>Female</b>                        | 1,486 (36.0)                         | 743 (36.0)                      | <b>COPD medications<sup>†</sup></b>                  |                                      |                                 |
| <b>Age, years (IQR)</b>              | 71 (64, 78)                          | 74 (67, 81)                     | SABA/SAMA                                            | 2,600 (62.9)                         | 1,489 (72.1)                    |
| <b>Smoking Status</b>                |                                      |                                 | LABA alone                                           | 106 (2.57)                           | 31 (1.50)                       |
| Current Smoker                       | 1,411 (34.2)                         | 497 (24.1)                      | LAMA alone                                           | 256 (6.20)                           | 163 (7.89)                      |
| Former Smoker                        | 2,721 (65.9)                         | 1,569 (75.9)                    | ICS alone                                            | 532 (12.9)                           | 92 (4.45)                       |
| <b>Body Mass Index</b>               |                                      |                                 | LABA+LAMA                                            | 35 (0.85)                            | 29 (1.40)                       |
| Underweight (< 18.5)                 | 200 (4.84)                           | 113 (5.47)                      | LABA+ICS                                             | 1,077 (26.1)                         | 476 (23.0)                      |
| Healthy Weight (18.5-24.9)           | 1,521 (36.8)                         | 640 (31.0)                      | LAMA+ICS                                             | 78 (1.89)                            | 27 (1.31)                       |
| Overweight (25.0-29.9)               | 1,415 (34.2)                         | 595 (28.8)                      | Triple                                               | 578 (14.0)                           | 823 (39.8)                      |
| Obese (>= 30)                        | 910 (22.0)                           | 667 (32.3)                      | No long-acting inhaler                               | 1,470 (35.6)                         | 425 (20.6)                      |
| Missing Data                         | 86 (2.08)                            | 51 (2.47)                       | <b>History of Cardiovascular Disease<sup>‡</sup></b> | 2,288 (55.4)                         | 1,687 (81.7)                    |
| <b>Index of Multiple Deprivation</b> |                                      |                                 | Atrial fibrillation                                  | 172 (4.16)                           | 671 (32.5)                      |
| 1 – Most deprived                    | 695 (16.8)                           | 268 (13.0)                      | Hypertension                                         | 1,935 (46.8)                         | 1,033 (50.0)                    |
| 2                                    | 856 (20.7)                           | 403 (19.5)                      | Ischaemic heart disease                              | 610 (14.8)                           | 838 (40.6)                      |
| 3                                    | 826 (20.0)                           | 406 (19.7)                      | Peripheral artery disease                            | 210 (5.08)                           | 222 (10.8)                      |
| 4                                    | 909 (22.0)                           | 473 (22.9)                      | Stroke                                               | 229 (5.54)                           | 231 (11.2)                      |
| 5 – Least deprived                   | 846 (20.5)                           | 516 (25.0)                      | <b>Diabetes mellitus</b>                             | 341 (8.25)                           | 459 (22.2)                      |
| <b>GOLD Stage</b>                    |                                      |                                 | <b>CVD medications<sup>†</sup></b>                   |                                      |                                 |
| 1: Mild                              | 1,577 (38.2)                         | 703 (34.0)                      | ACEi                                                 | 697 (16.9)                           | 1,230 (59.5)                    |
| 2: Moderate                          | 1,122 (27.2)                         | 486 (23.5)                      | ARB                                                  | 262 (6.34)                           | 332 (16.1)                      |
| 3: Severe                            | 605 (14.6)                           | 426 (20.6)                      | Beta-blockers                                        | 293 (7.09)                           | 737 (35.7)                      |
| 4: Very Severe                       | 112 (2.71)                           | 166 (8.03)                      | Calcium channel blockers                             | 397 (9.61)                           | 329 (15.9)                      |
| Missing                              | 716 (17.3)                           | 285 (13.8)                      | MRA                                                  | 10 (0.24)                            | 479 (23.2)                      |
|                                      |                                      |                                 | Statins                                              | 1,215 (29.4)                         | 1,152 (55.8)                    |
|                                      |                                      |                                 | Vasodilators                                         | 254 (6.15)                           | 320 (15.5)                      |

Table E2. Descriptive statistics for the matched cohort of chronic obstructive pulmonary disease (COPD) patients without evidence of heart failure (HF) and COPD patients with diagnosed HF. Proportions may not sum to 100% due to rounding. Severity of airflow limitation using the Global Initiative for Chronic Obstructive Lung Disease (GOLD) guidelines [1]. Angiotensin converting enzyme inhibitors (ACEi). Angiotensin receptor blockers (ARB). Beta-blockers (BB). Calcium channel blockers (CCB). Interquartile range (IQR). Long-acting beta agonists (LABA). Inhaled corticosteroids (ICS). Long-acting muscarinic antagonist (LAMA). Mineralocorticoid receptor antagonists (MRA). Short-acting beta agonists (SABA). Short-acting muscarinic antagonist (SAMA). \*Average number of exacerbations per patient (range) in the year prior to the start of follow-up. †At least two prescriptions >15 days apart in the year prior to the start of follow-up. ‡Prior diagnosis of ischaemic heart disease, peripheral artery disease, atrial fibrillation, hypertension, and/or stroke.

|                                      | COPD patients without evidence of HF | COPD patients with possible HF |                                                      | COPD patients without evidence of HF | COPD patients with possible HF |
|--------------------------------------|--------------------------------------|--------------------------------|------------------------------------------------------|--------------------------------------|--------------------------------|
| <b>Number of Patients (N)</b>        | 16,792                               | 8,423                          | <b>Exacerbation History*</b>                         | 1 (0, 2)                             | 2 (0, 3)                       |
| <b>Female</b>                        | 8,365 (49.8)                         | 4,206 (49.9)                   | <b>COPD medications<sup>†</sup></b>                  |                                      |                                |
| <b>Age, years (IQR)</b>              | 73 (65, 80)                          | 73 (66, 80)                    | SABA/SAMA                                            | 10,834 (64.5)                        | 6,194 (73.5)                   |
| <b>Smoking Status</b>                |                                      |                                | LABA alone                                           | 454 (2.70)                           | 250 (2.97)                     |
| Current Smoker                       | 5,872 (35.0)                         | 2,561 (30.4)                   | LAMA alone                                           | 1,068 (6.36)                         | 535 (6.35)                     |
| Former Smoker                        | 10,920 (65.0)                        | 5,862 (69.6)                   | ICS alone                                            | 2,115 (12.6)                         | 939 (11.2)                     |
| <b>Body Mass Index</b>               |                                      |                                | LABA+LAMA                                            | 129 (0.77)                           | 80 (0.95)                      |
| Underweight (< 18.5)                 | 1,005 (5.98)                         | 351 (4.17)                     | LABA+ICS                                             | 4,421 (26.3)                         | 2,423 (28.8)                   |
| Healthy Weight (18.5-24.9)           | 6,448 (38.4)                         | 2,231 (26.5)                   | LAMA+ICS                                             | 373 (2.22)                           | 205 (2.43)                     |
| Overweight (25.0-29.9)               | 5,458 (32.5)                         | 2,323 (27.6)                   | Triple                                               | 2,414 (14.4)                         | 1,915 (22.7)                   |
| Obese (>= 30)                        | 3,353 (20.0)                         | 3,180 (37.8)                   | No long-acting inhaler                               | 5,818 (34.7)                         | 2,076 (24.7)                   |
| Missing Data                         | 528 (3.14)                           | 338 (4.01)                     | <b>History of Cardiovascular Disease<sup>‡</sup></b> | 9,353 (55.7)                         | 6,485 (77.0)                   |
| <b>Index of Multiple Deprivation</b> |                                      |                                | Atrial fibrillation                                  | 716 (4.26)                           | 987 (11.7)                     |
| 1 – Most deprived                    | 2,699 (16.1)                         | 1,123 (13.4)                   | Hypertension                                         | 7,818 (46.6)                         | 5,444 (64.6)                   |
| 2                                    | 3,491 (20.8)                         | 1,707 (20.3)                   | Ischaemic heart disease                              | 2,381 (14.2)                         | 2,218 (26.3)                   |
| 3                                    | 3,310 (19.7)                         | 1,602 (19.0)                   | Peripheral artery disease                            | 1,004 (5.98)                         | 652 (7.74)                     |
| 4                                    | 3,759 (22.4)                         | 1,964 (23.3)                   | Stroke                                               | 1,018 (6.06)                         | 786 (9.33)                     |
| 5 – Least deprived                   | 3,533 (21.0)                         | 2,021 (24.0)                   | <b>Diabetes mellitus</b>                             | 1,388 (8.27)                         | 1,354 (16.1)                   |
| <b>GOLD Stage</b>                    |                                      |                                | <b>CVD medications<sup>†</sup></b>                   |                                      |                                |
| 1: Mild                              | 6,208 (37.0)                         | 2,985 (35.4)                   | ACEi                                                 | 2,721 (16.2)                         | 2,436 (28.9)                   |
| 2: Moderate                          | 4,347 (25.9)                         | 1,753 (20.8)                   | ARB                                                  | 1,053 (6.27)                         | 896 (10.6)                     |
| 3: Severe                            | 2,383 (14.2)                         | 1,447 (17.2)                   | Beta-blockers                                        | 1,062 (6.32)                         | 1,002 (11.9)                   |
| 4: Very Severe                       | 503 (3.00)                           | 401 (4.76)                     | Calcium channel blockers                             | 1,770 (10.5)                         | 1,462 (17.4)                   |
| Missing                              | 3,351 (20.0)                         | 1,837 (21.8)                   | MRA                                                  | 62 (0.37)                            | 276 (3.28)                     |
|                                      |                                      |                                | Statins                                              | 4,611 (27.5)                         | 3,490 (41.4)                   |
|                                      |                                      |                                | Vasodilators                                         | 1,142 (6.80)                         | 1,250 (14.8)                   |

Table E3. Descriptive statistics for the matched cohort of chronic obstructive pulmonary disease (COPD) patients without evidence of heart failure (HF) and COPD patients with possible HF. Proportions may not sum to 100% due to rounding. Severity of airflow limitation using the Global Initiative for Chronic Obstructive Lung Disease (GOLD) guidelines [1]. Angiotensin converting enzyme inhibitors (ACEi). Angiotensin receptor blockers (ARB). Beta-blockers (BB). Calcium channel blockers (CCB). Interquartile range (IQR). Long-acting beta agonists (LABA). Inhaled corticosteroids (ICS). Long-acting muscarinic antagonist (LAMA). Mineralocorticoid receptor antagonists (MRA). Short-acting beta agonists (SABA). Short-acting muscarinic antagonist (SAMA). \*Average number of exacerbations per patient (range) in the year prior to the start of follow-up. †At least two prescriptions >15 days apart in the year prior to the start of follow-up. ‡Prior diagnosis of ischaemic heart disease, peripheral artery disease, atrial fibrillation, hypertension, and/or stroke.

|                                      | <b>COPD-HF Patients</b> |                                                      | <b>COPD-HF Patients</b> |
|--------------------------------------|-------------------------|------------------------------------------------------|-------------------------|
| <b>Number of Patients (N)</b>        | 8,901                   | <b>Exacerbation History (IQR)</b>                    | 2 (0, 3)                |
| <b>Female</b>                        | 3,278 (36.8)            | <b>COPD medications<sup>†</sup></b>                  |                         |
| <b>Age, years (IQR)</b>              | 77.5 (70.5, 83.3)       | SABA/SAMA                                            | 8,901 (100)             |
| <b>Smoking Status</b>                |                         | LABA alone                                           | 194 (2.18)              |
| Current Smoker                       | 1,848 (20.8)            | LAMA alone                                           | 703 (7.90)              |
| Former Smoker                        | 7,053 (79.2)            | ICS alone                                            | 775 (8.71)              |
| <b>Body Mass Index</b>               |                         | LABA+LAMA                                            | 109 (1.22)              |
| Underweight (< 18.5)                 | 303 (3.40)              | LABA+ICS                                             | 2,203 (24.8)            |
| Healthy Weight (18.5-24.9)           | 2,470 (27.8)            | LAMA+ICS                                             | 150 (1.69)              |
| Overweight (25.0-29.9)               | 2,769 (31.1)            | Triple                                               | 2,174 (24.4)            |
| Obese (>= 30)                        | 3,014 (33.9)            | No long-acting inhaler                               | 0                       |
| Missing Data                         | 345 (3.88)              | <b>History of Cardiovascular Disease<sup>‡</sup></b> | 7,926 (89.1)            |
| <b>Index of Multiple Deprivation</b> |                         | Atrial fibrillation                                  | 3,142 (35.3)            |
| 1 – Most deprived                    | 1,236 (13.9)            | Hypertension                                         | 5,037 (56.6)            |
| 2                                    | 1,770 (19.9)            | Ischaemic heart disease                              | 4,878 (54.8)            |
| 3                                    | 1,760 (19.8)            | Peripheral artery disease                            | 1,202 (13.5)            |
| 4                                    | 2,041 (22.9)            | Stroke                                               | 1,271 (14.3)            |
| 5 – Least deprived                   | 2,094 (23.5)            | <b>Diabetes mellitus</b>                             | 2,366 (26.6)            |
| <b>GOLD Stage</b>                    |                         |                                                      |                         |
| 1: Mild                              | 3,220 (36.2)            |                                                      |                         |
| 2: Moderate                          | 1,923 (21.6)            |                                                      |                         |
| 3: Severe                            | 1,345 (15.1)            |                                                      |                         |
| 4: Very Severe                       | 353 (3.97)              |                                                      |                         |
| Missing                              | 2,060 (23.1)            |                                                      |                         |

Table E4. Descriptive statistics of chronic obstructive pulmonary disease (COPD) patients with heart failure (HF) comorbidity at baseline. Interquartile range (IQR). Global Initiative for Chronic Obstructive Lung Diseases (GOLD) staging of COPD severity [1]. †Recorded at baseline; patients could have multiple risk factors.

|                                      | Non-Users of ACEi | Incident Users of ACEi (<6 months) | Prevalent Users of ACEi (≥6 months) |                                                      | Non-Users of ACEi | Incident Users of ACEi (<6 months) | Prevalent Users of ACEi (≥6 months) |
|--------------------------------------|-------------------|------------------------------------|-------------------------------------|------------------------------------------------------|-------------------|------------------------------------|-------------------------------------|
| <b>Number of Patients (N)</b>        | 4,136             | 1,237                              | 5,055                               | <b>Exacerbation History (IQR)</b>                    | 2 (1, 4)          | 3 (1, 4)                           | 2 (1, 4)                            |
| <b>Female</b>                        | 1,707 (41.3)      | 455 (36.8)                         | 1,698 (33.6)                        | <b>COPD medications<sup>†</sup></b>                  |                   |                                    |                                     |
| <b>Age, years (IQR)</b>              | 78.5 (72.0, 84.2) | 77.2 (70.4, 83.0)                  | 76.5 (69.5, 82.5)                   | SABA/SAMA                                            | 4,136 (100)       | 1,237 (100)                        | 5,055 (100)                         |
| <b>Smoking Status</b>                |                   |                                    |                                     | LABA alone                                           | 81 (1.96)         | 30 (2.43)                          | 111 (2.20)                          |
| Current Smoker                       | 776 (18.8)        | 281 (22.7)                         | 1,131 (22.4)                        | LAMA alone                                           | 331 (8.00)        | 92 (7.44)                          | 395 (7.81)                          |
| Former Smoker                        | 3,360 (81.2)      | 956 (77.3)                         | 3,924 (77.6)                        | ICS alone                                            | 356 (8.61)        | 97 (7.84)                          | 422 (8.35)                          |
| <b>Body Mass Index</b>               |                   |                                    |                                     | LABA+LAMA                                            | 45 (1.09)         | 16 (1.29)                          | 73 (1.44)                           |
| Underweight (< 18.5)                 | 158 (3.82)        | 41 (3.31)                          | 156 (3.09)                          | LABA+ICS                                             | 1,055 (25.5)      | 321 (26.0)                         | 1,221 (24.2)                        |
| Healthy Weight (18.5-24.9)           | 1,167 (28.2)      | 386 (31.2)                         | 1,403 (27.8)                        | LAMA+ICS                                             | 58 (1.40)         | 19 (2.34)                          | 94 (1.86)                           |
| Overweight (25.0-29.9)               | 1,260 (30.5)      | 367 (29.7)                         | 1,592 (31.5)                        | Triple                                               | 1,016 (24.6)      | 313 (25.3)                         | 1,253 (24.8)                        |
| Obese (≥ 30)                         | 1,340 (32.4)      | 414 (33.5)                         | 1,766 (34.9)                        | No long-acting inhaler                               | 0                 | 0                                  | 0                                   |
| Missing Data                         | 211 (5.10)        | 29 (2.34)                          | 138 (2.73)                          | <b>History of Cardiovascular Disease<sup>‡</sup></b> | 3,604 (87.1)      | 1,119 (90.5)                       | 4,583 (90.7)                        |
| <b>Index of Multiple Deprivation</b> |                   |                                    |                                     | Atrial fibrillation                                  | 1,461 (35.3)      | 450 (36.4)                         | 1,803 (35.7)                        |
| 1 – Most deprived                    | 572 (13.8)        | 155 (12.5)                         | 696 (13.8)                          | Hypertension                                         | 2,265 (54.8)      | 707 (57.2)                         | 2,940 (58.2)                        |
| 2                                    | 823 (19.9)        | 242 (19.6)                         | 1,006 (19.9)                        | Ischaemic heart disease                              | 2,105 (50.9)      | 699 (56.5)                         | 2,916 (57.7)                        |
| 3                                    | 840 (20.3)        | 233 (18.8)                         | 978 (19.4)                          | Peripheral artery disease                            | 548 (13.3)        | 140 (11.3)                         | 693 (13.7)                          |
| 4                                    | 961 (23.2)        | 306 (24.7)                         | 1,156 (22.9)                        | Stroke                                               | 603 (14.6)        | 181 (14.6)                         | 719 (14.2)                          |
| 5 – Least deprived                   | 940 (22.7)        | 301 (24.3)                         | 1,219 (24.1)                        | <b>Diabetes mellitus</b>                             | 1,038 (25.1)      | 353 (28.5)                         | 1,420 (28.1)                        |
| <b>GOLD Stage</b>                    |                   |                                    |                                     | <b>CVD medications<sup>†</sup></b>                   |                   |                                    |                                     |
| 1: Mild                              | 1,511 (36.5)      | 429 (34.7)                         | 1,826 (36.1)                        | ARB                                                  | 1,648 (39.9)      | 106 (8.57)                         | 147 (2.91)                          |
| 2: Moderate                          | 850 (20.6)        | 279 (22.6)                         | 1,156 (22.9)                        | Beta-blockers                                        | 1,140 (27.6)      | 331 (26.8)                         | 1,780 (35.2)                        |
| 3: Severe                            | 569 (13.8)        | 213 (17.2)                         | 819 (16.2)                          | Calcium channel blockers                             | 687 (16.6)        | 221 (17.9)                         | 775 (15.3)                          |
| 4: Very Severe                       | 149 (3.60)        | 72 (5.82)                          | 223 (4.41)                          | Loop diuretics                                       | 2,760 (66.7)      | 801 (64.8)                         | 3,523 (69.7)                        |
| Missing                              | 1,057 (25.6)      | 244 (19.7)                         | 1,031 (20.4)                        | MRA                                                  | 858 (20.7)        | 226 (18.3)                         | 1,130 (22.4)                        |
|                                      |                   |                                    |                                     | Statins                                              | 2,180 (52.7)      | 713 (57.6)                         | 3,294 (65.2)                        |
|                                      |                   |                                    |                                     | Vasodilators                                         | 907 (21.9)        | 287 (23.2)                         | 1,162 (23.0)                        |

Table E5. Descriptive statistics for non-users, incident users, and prevalent users of angiotensin converting enzyme inhibitors (ACEi) at start of follow-up. Proportions may not sum to 100% due to rounding. Severity of airflow limitation using the Global Initiative for Chronic Obstructive Lung Disease (GOLD) guidelines [1]. Angiotensin receptor blockers (ARB). Beta-blockers (BB). Calcium channel blockers (CCB). Interquartile range (IQR). Long-acting beta agonists (LABA). Inhaled corticosteroids (ICS). Long-acting muscarinic antagonist (LAMA). Mineralocorticoid receptor antagonists (MRA). Short-acting beta agonists (SABA). Short-acting muscarinic antagonist (SAMA). <sup>†</sup>At least two prescriptions >15 days apart in the year prior to the start of follow-up. <sup>‡</sup>Prior diagnosis of ischaemic heart disease, peripheral artery disease, atrial fibrillation, hypertension, and/or stroke.



|                                      | Non-Users of ARB  | Incident Users of ARB (<6 months) | Prevalent Users of ARB (≥6 months) |                                                      | Non-Users of ARB | Incident Users of ARB (<6 months) | Prevalent Users of ARB (≥6 months) |
|--------------------------------------|-------------------|-----------------------------------|------------------------------------|------------------------------------------------------|------------------|-----------------------------------|------------------------------------|
| <b>Number of Patients (N)</b>        | 7,253             | 668                               | 1,914                              | <b>Exacerbation History (IQR)</b>                    | 2 (0, 3)         | 2 (1, 4)                          | 2 (1, 4)                           |
| <b>Female</b>                        | 2,645 (36.5)      | 257 (38.5)                        | 723 (37.8)                         | <b>COPD medications<sup>†</sup></b>                  |                  |                                   |                                    |
| <b>Age, years (IQR)</b>              | 77.5 (70.5, 83.5) | 76.9 (69.6, 82.4)                 | 76.6 (70.1, 82.2)                  | SABA/SAMA                                            | 7,253 (100)      | 668 (100)                         | 1,914 (100)                        |
| <b>Smoking Status</b>                |                   |                                   |                                    | LABA alone                                           | 156 (2.15)       | 10 (1.50)                         | 45 (2.35)                          |
| Current Smoker                       | 1,606 (22.1)      | 110 (16.5)                        | 277 (14.5)                         | LAMA alone                                           | 554 (7.64)       | 60 (8.98)                         | 166 (8.67)                         |
| Former Smoker                        | 5,647 (77.9)      | 558 (83.5)                        | 1,637 (85.5)                       | ICS alone                                            | 648 (8.93)       | 54 (8.08)                         | 143 (7.47)                         |
| <b>Body Mass Index</b>               |                   |                                   |                                    | LABA+LAMA                                            | 90 (8.93)        | 6 (0.90)                          | 21 (1.10)                          |
| Underweight (< 18.5)                 | 280 (3.86)        | 14 (2.10)                         | 29 (1.52)                          | LABA+ICS                                             | 1,776 (24.5)     | 162 (24.3)                        | 494 (25.8)                         |
| Healthy Weight (18.5-24.9)           | 2,092 (28.8)      | 177 (26.5)                        | 445 (23.3)                         | LAMA+ICS                                             | 121 (1.67)       | 15 (2.25)                         | 33 (1.72)                          |
| Overweight (25.0-29.9)               | 2,242 (30.9)      | 205 (30.7)                        | 611 (31.9)                         | Triple                                               | 1,759 (24.3)     | 206 (30.8)                        | 519 (27.1)                         |
| Obese (≥ 30)                         | 2,328 (32.1)      | 263 (39.4)                        | 796 (41.6)                         | No long-acting inhaler                               | 0                | 0                                 | 0                                  |
| Missing Data                         | 311 (4.29)        | 9 (1.35)                          | 33 (1.72)                          | <b>History of Cardiovascular Disease<sup>‡</sup></b> | 6,369 (87.8)     | 616 (92.2)                        | 1,803 (94.2)                       |
| <b>Index of Multiple Deprivation</b> |                   |                                   |                                    | Atrial fibrillation                                  | 2,548 (35.1)     | 242 (36.2)                        | 697 (36.4)                         |
| 1 – Most deprived                    | 988 (13.6)        | 108 (16.2)                        | 287 (15.0)                         | Hypertension                                         | 3,927 (54.1)     | 435 (65.1)                        | 1,269 (66.3)                       |
| 2                                    | 1,428 (19.7)      | 136 (20.4)                        | 403 (21.1)                         | Ischaemic heart disease                              | 3,886 (53.6)     | 394 (59.0)                        | 1,149 (60.0)                       |
| 3                                    | 1,383 (19.1)      | 144 (21.6)                        | 430 (22.5)                         | Peripheral artery disease                            | 968 (13.4)       | 102 (15.3)                        | 283 (14.8)                         |
| 4                                    | 1,690 (23.3)      | 143 (21.4)                        | 408 (21.3)                         | Stroke                                               | 1,055 (14.6)     | 66 (9.88)                         | 246 (12.9)                         |
| 5 – Least deprived                   | 1,764 (24.3)      | 137 (20.5)                        | 386 (20.2)                         | <b>Diabetes mellitus</b>                             | 1,883 (26.0)     | 223 (33.4)                        | 581 (30.4)                         |
| <b>GOLD Stage</b>                    |                   |                                   |                                    | <b>CVD medications<sup>†</sup></b>                   |                  |                                   |                                    |
| 1: Mild                              | 2,545 (35.1)      | 284 (42.5)                        | 798 (41.7)                         | ACEi                                                 | 4,918 (67.8)     | 380 (56.9)                        | 425 (22.2)                         |
| 2: Moderate                          | 1,528 (21.1)      | 169 (25.3)                        | 463 (24.2)                         | Beta-blockers                                        | 2,234 (30.8)     | 233 (34.9)                        | 669 (35.0)                         |
| 3: Severe                            | 1,114 (15.4)      | 101 (15.1)                        | 271 (14.2)                         | Calcium channel blockers                             | 1,117 (15.4)     | 127 (19.0)                        | 330 (17.2)                         |
| 4: Very Severe                       | 305 (4.21)        | 26 (3.89)                         | 60 (3.13)                          | Loop diuretics                                       | 4,967 (68.5)     | 449 (67.2)                        | 1,288 (67.3)                       |
| Missing                              | 1,761 (24.3)      | 88 (13.2)                         | 322 (16.8)                         | MRA                                                  | 1,536 (21.2)     | 163 (24.4)                        | 453 (23.7)                         |
|                                      |                   |                                   |                                    | Statins                                              | 4,205 (58.0)     | 434 (65.0)                        | 1,298 (67.8)                       |
|                                      |                   |                                   |                                    | Vasodilators                                         | 1,592 (22.0)     | 179 (26.8)                        | 498 (26.0)                         |

Table E6. Descriptive statistics for non-users, incident users, and prevalent users of angiotensin receptor blockers (ARB) at start of follow-up. Proportions may not sum to 100% due to rounding. Severity of airflow limitation using the Global Initiative for Chronic Obstructive Lung Disease (GOLD) guidelines [1]. Angiotensin converting enzyme inhibitors (ACEi). Beta-blockers (BB). Calcium channel blockers (CCB). Interquartile range (IQR). Long-acting beta agonists (LABA). Inhaled corticosteroids (ICS). Long-acting muscarinic antagonist (LAMA). Mineralocorticoid receptor antagonists (MRA). Short-acting beta agonists (SABA). Short-acting muscarinic antagonist (SAMA). <sup>†</sup>At least two prescriptions >15 days apart in the year prior to the start of follow-up. <sup>‡</sup>Prior diagnosis of ischaemic heart disease, peripheral artery disease, atrial fibrillation, hypertension, and/or stroke.

|                                      | Non-Users of BB   | Incident Users of BB (<6 months) | Prevalent Users of BB (≥6 months) |                                                      | Non-Users of BB | Incident Users of BB (<6 months) | Prevalent Users of BB (≥6 months) |
|--------------------------------------|-------------------|----------------------------------|-----------------------------------|------------------------------------------------------|-----------------|----------------------------------|-----------------------------------|
| <b>Number of Patients (N)</b>        | 6,161             | 1,163                            | 3,259                             | <b>Exacerbation History (IQR)</b>                    | 2 (1, 3)        | 2 (1, 4)                         | 2 (1, 4)                          |
| <b>Female</b>                        | 2,457 (40.0)      | 356 (30.6)                       | 985 (30.2)                        | <b>COPD medications<sup>†</sup></b>                  |                 |                                  |                                   |
| <b>Age, years (IQR)</b>              | 78.4 (71.5, 83.8) | 76.9 (70.1, 82.7)                | 75.7 (68.5, 81.8)                 | SABA/SAMA                                            | 6,161 (100)     | 1,163 (100)                      | 3,259 (100)                       |
| <b>Smoking Status</b>                |                   |                                  |                                   | LABA alone                                           | 139 (2.26)      | 25 (2.15)                        | 62 (1.90)                         |
| Current Smoker                       | 1,199 (19.5)      | 202 (17.4)                       | 723 (22.2)                        | LAMA alone                                           | 389 (6.31)      | 77 (6.62)                        | 345 (10.6)                        |
| Former Smoker                        | 4,962 (80.5)      | 961 (82.6)                       | 2,536 (77.8)                      | ICS alone                                            | 620 (10.1)      | 50 (4.30)                        | 189 (5.80)                        |
| <b>Body Mass Index</b>               |                   |                                  |                                   | LABA+LAMA                                            | 75 (1.22)       | 9 (0.77)                         | 40 (1.23)                         |
| Underweight (< 18.5)                 | 239 (3.88)        | 31 (2.67)                        | 77 (2.36)                         | LABA+ICS                                             | 1,706 (27.7)    | 268 (23.0)                       | 627 (19.2)                        |
| Healthy Weight (18.5-24.9)           | 1,783 (28.9)      | 335 (28.8)                       | 849 (26.1)                        | LAMA+ICS                                             | 106 (1.72)      | 20 (1.72)                        | 56 (1.72)                         |
| Overweight (25.0-29.9)               | 1,849 (30.0)      | 351 (30.2)                       | 1,052 (32.3)                      | Triple                                               | 1,519 (24.7)    | 345 (29.7)                       | 826 (25.4)                        |
| Obese (≥ 30)                         | 1,991 (32.3)      | 432 (37.2)                       | 1,230 (37.7)                      | No long-acting inhaler                               | 0               | 0                                | 0                                 |
| Missing Data                         | 299 (4.85)        | 14 (1.20)                        | 51 (1.56)                         | <b>History of Cardiovascular Disease<sup>‡</sup></b> | 5,367 (87.1)    | 1,095 (94.2)                     | 3,048 (93.5)                      |
| <b>Index of Multiple Deprivation</b> |                   |                                  |                                   | Atrial fibrillation                                  | 2,029 (32.9)    | 535 (46.0)                       | 1,355 (41.6)                      |
| 1 – Most deprived                    | 831 (13.5)        | 173 (14.9)                       | 480 (14.7)                        | Hypertension                                         | 3,371 (54.7)    | 705 (60.6)                       | 1,978 (60.7)                      |
| 2                                    | 1,240 (20.1)      | 220 (18.9)                       | 637 (19.6)                        | Ischaemic heart disease                              | 3,115 (50.6)    | 760 (65.4)                       | 2,090 (64.1)                      |
| 3                                    | 1,228 (19.9)      | 216 (18.6)                       | 619 (19.0)                        | Peripheral artery disease                            | 803 (13.0)      | 183 (15.7)                       | 490 (15.0)                        |
| 4                                    | 1,397 (22.7)      | 272 (23.4)                       | 768 (23.6)                        | Stroke                                               | 891 (14.5)      | 186 (16.0)                       | 473 (14.5)                        |
| 5 – Least deprived                   | 1,465 (23.8)      | 282 (24.3)                       | 755 (23.2)                        | <b>Diabetes mellitus</b>                             | 1,517 (24.6)    | 380 (32.7)                       | 1,017 (31.2)                      |
| <b>GOLD Stage</b>                    |                   |                                  |                                   | <b>CVD medications<sup>†</sup></b>                   |                 |                                  |                                   |
| 1: Mild                              | 2,108 (34.2)      | 462 (39.7)                       | 1,341 (41.2)                      | ACEi                                                 | 3,406 (55.3)    | 700 (60.2)                       | 2,100 (64.4)                      |
| 2: Moderate                          | 1,263 (20.5)      | 314 (27.0)                       | 806 (24.7)                        | ARB                                                  | 1,144 (18.6)    | 249 (21.4)                       | 721 (22.1)                        |
| 3: Severe                            | 970 (15.7)        | 179 (15.4)                       | 460 (14.1)                        | Calcium channel blockers                             | 1,155 (18.8)    | 201 (17.3)                       | 320 (9.82)                        |
| 4: Very Severe                       | 288 (4.67)        | 36 (3.10)                        | 79 (2.42)                         | Loop diuretics                                       | 4,178 (67.8)    | 811 (69.7)                       | 2,295 (70.4)                      |
| Missing                              | 1,532 (24.9)      | 172 (14.8)                       | 573 (17.6)                        | MRA                                                  | 1,095 (17.8)    | 282 (24.3)                       | 994 (30.5)                        |
|                                      |                   |                                  |                                   | Statins                                              | 3,322 (53.9)    | 785 (67.5)                       | 2,346 (72.0)                      |
|                                      |                   |                                  |                                   | Vasodilators                                         | 1,378 (22.4)    | 319 (27.4)                       | 803 (24.6)                        |

Table E7. Descriptive statistics for non-users, incident users, and prevalent users of beta-blockers (BB) at start of follow-up. Proportions may not sum to 100% due to rounding. Severity of airflow limitation using the Global Initiative for Chronic Obstructive Lung Disease (GOLD) guidelines [1]. Angiotensin converting enzyme inhibitors (ACEi). Angiotensin receptor blockers (ARB). Calcium channel blockers (CCB). Interquartile range (IQR). Long-acting beta agonists (LABA). Inhaled corticosteroids (ICS). Long-acting muscarinic antagonist (LAMA). Mineralocorticoid receptor antagonists (MRA). Short-acting beta agonists (SABA). Short-acting muscarinic antagonist (SAMA). <sup>†</sup>At least two prescriptions >15 days apart in the year prior to the start of follow-up. <sup>‡</sup>Prior diagnosis of ischaemic heart disease, peripheral artery disease, atrial fibrillation, hypertension, and/or stroke.

|                                      | Non-Users of LD   | Incident Users of LD (<6 months) | Prevalent Users of LD (≥6 months) |                                                      | Non-Users of LD | Incident Users of LD (<6 months) | Prevalent Users of LD (≥6 months) |
|--------------------------------------|-------------------|----------------------------------|-----------------------------------|------------------------------------------------------|-----------------|----------------------------------|-----------------------------------|
| <b>Number of Patients (N)</b>        | 3,037             | 2,105                            | 6,334                             | <b>Exacerbation History (IQR)</b>                    | 1 (0, 3)        | 2 (1, 4)                         | 2 (1, 4)                          |
| <b>Female</b>                        | 1,025 (33.8)      | 746 (35.4)                       | 2,428 (38.3)                      | <b>COPD medications<sup>†</sup></b>                  |                 |                                  |                                   |
| <b>Age, years (IQR)</b>              | 76.2 (69.1, 82.3) | 78.1 (71.4, 83.6)                | 78.2 (71.4, 83.7)                 | SABA/SAMA                                            | 3,037 (100)     | 2,105 (100)                      | 6,334 (100)                       |
| <b>Smoking Status</b>                |                   |                                  |                                   | LABA alone                                           | 67 (2.21)       | 34 (1.63)                        | 136 (2.15)                        |
| Current Smoker                       | 747 (24.6)        | 402 (19.1)                       | 1,186 (18.7)                      | LAMA alone                                           | 262 (8.63)      | 153 (7.27)                       | 474 (7.48)                        |
| Former Smoker                        | 2,290 (75.4)      | 1,703 (80.9)                     | 5,148 (81.3)                      | ICS alone                                            | 248 (8.17)      | 166 (7.89)                       | 544 (8.59)                        |
| <b>Body Mass Index</b>               |                   |                                  |                                   | LABA+LAMA                                            | 35 (1.15)       | 30 (1.43)                        | 76 (1.20)                         |
| Underweight (< 18.5)                 | 135 (4.45)        | 83 (3.94)                        | 186 (2.94)                        | LABA+ICS                                             | 695 (22.9)      | 525 (24.9)                       | 1,606 (25.4)                      |
| Healthy Weight (18.5-24.9)           | 935 (30.8)        | 592 (28.1)                       | 1,703 (26.9)                      | LAMA+ICS                                             | 52 (1.71)       | 45 (2.14)                        | 105 (1.66)                        |
| Overweight (25.0-29.9)               | 964 (31.7)        | 647 (30.7)                       | 1,935 (30.6)                      | Triple                                               | 688 (22.7)      | 579 (27.5)                       | 1,678 (26.5)                      |
| Obese (≥ 30)                         | 891 (29.3)        | 717 (34.1)                       | 2,271 (35.9)                      | No long-acting inhaler                               | 0               | 0                                | 0                                 |
| Missing Data                         | 112 (3.69)        | 66 (3.14)                        | 239 (3.77)                        | <b>History of Cardiovascular Disease<sup>‡</sup></b> | 2,649 (87.2)    | 1,908 (90.6)                     | 5,702 (90.0)                      |
| <b>Index of Multiple Deprivation</b> |                   |                                  |                                   | Atrial fibrillation                                  | 875 (28.8)      | 827 (39.3)                       | 2,468 (39.0)                      |
| 1 – Most deprived                    | 450 (14.8)        | 308 (14.6)                       | 842 (13.3)                        | Hypertension                                         | 1,624 (53.5)    | 1,225 (58.2)                     | 3,696 (58.4)                      |
| 2                                    | 576 (19.0)        | 430 (20.4)                       | 1,283 (20.3)                      | Ischaemic heart disease                              | 1,625 (53.5)    | 1,167 (55.4)                     | 3,524 (55.6)                      |
| 3                                    | 610 (20.1)        | 424 (20.1)                       | 1,256 (19.8)                      | Peripheral artery disease                            | 413 (13.6)      | 292 (13.9)                       | 873 (13.8)                        |
| 4                                    | 709 (23.4)        | 286 (23.1)                       | 1,444 (22.8)                      | Stroke                                               | 414 (13.6)      | 322 (15.3)                       | 938 (14.8)                        |
| 5 – Least deprived                   | 692 (22.8)        | 457 (21.7)                       | 1,509 (23.8)                      | <b>Diabetes mellitus</b>                             | 667 (22.0)      | 554 (26.3)                       | 1,817 (28.7)                      |
| <b>GOLD Stage</b>                    |                   |                                  |                                   | <b>CVD medications<sup>†</sup></b>                   |                 |                                  |                                   |
| 1: Mild                              | 1,146 (37.7)      | 785 (37.3)                       | 2,272 (35.9)                      | ACEi                                                 | 1,684 (55.5)    | 1,159 (55.1)                     | 3,728 (58.9)                      |
| 2: Moderate                          | 664 (21.9)        | 481 (22.9)                       | 1,397 (22.1)                      | ARB                                                  | 566 (18.6)      | 466 (22.1)                       | 1,295 (20.5)                      |
| 3: Severe                            | 439 (14.5)        | 341 (16.2)                       | 1,005 (15.9)                      | Beta-blockers                                        | 941 (31.0)      | 616 (29.3)                       | 2,054 (32.4)                      |
| 4: Very Severe                       | 110 (3.62)        | 92 (4.37)                        | 260 (4.10)                        | Calcium channel blockers                             | 501 (16.5)      | 353 (16.8)                       | 983 (15.5)                        |
| Missing                              | 678 (22.3)        | 406 (19.3)                       | 1,400 (22.1)                      | MRA                                                  | 367 (12.1)      | 402 (19.1)                       | 1,643 (25.9)                      |
|                                      |                   |                                  |                                   | Statins                                              | 1,781 (58.6)    | 1,227 (58.3)                     | 3,810 (60.2)                      |
|                                      |                   |                                  |                                   | Vasodilators                                         | 591 (19.5)      | 507 (24.1)                       | 1,553 (24.5)                      |

Table E8. Descriptive statistics for non-users, incident users, and prevalent users of loop diuretics (LD) at start of follow-up. Proportions may not sum to 100% due to rounding. Severity of airflow limitation using the Global Initiative for Chronic Obstructive Lung Disease (GOLD) guidelines [1]. Angiotensin converting enzyme inhibitors (ACEi). Angiotensin receptor blockers (ARB). Calcium channel blockers (CCB). Interquartile range (IQR). Long-acting beta agonists (LABA). Inhaled corticosteroids (ICS). Long-acting muscarinic antagonist (LAMA). Mineralocorticoid receptor antagonists (MRA). Short-acting beta agonists (SABA). Short-acting muscarinic antagonist (SAMA). <sup>†</sup>At least two prescriptions >15 days apart in the year prior to the start of follow-up. <sup>‡</sup>Prior diagnosis of ischaemic heart disease, peripheral artery disease, atrial fibrillation, hypertension, and/or stroke.

|                                      | Non-Users of MRA  | Incident Users of MRA (<6 months) | Prevalent Users of MRA (≥6 months) |                                                      | Non-Users of MRA | Incident Users of MRA (<6 months) | Prevalent Users of MRA (≥6 months) |
|--------------------------------------|-------------------|-----------------------------------|------------------------------------|------------------------------------------------------|------------------|-----------------------------------|------------------------------------|
| <b>Number of Patients (N)</b>        | 7,146             | 1,335                             | 2,244                              | <b>Exacerbation History (IQR)</b>                    | 2 (0, 3)         | 3 (1, 5)                          | 2 (1, 4)                           |
| <b>Female</b>                        | 2,674 (37.4)      | 428 (32.1)                        | 731 (32.6)                         | <b>COPD medications<sup>†</sup></b>                  |                  |                                   |                                    |
| <b>Age, years (IQR)</b>              | 77.6 (71.1, 83.5) | 77.3 (70.8, 83.4)                 | 75.9 (68.6, 81.9)                  | SABA/SAMA                                            | 7,146 (100)      | 1,335 (100)                       | 2,244 (100)                        |
| <b>Smoking Status</b>                |                   |                                   |                                    | LABA alone                                           | 155 (2.17)       | 27 (2.02)                         | 46 (2.05)                          |
| Current Smoker                       | 1,468 (20.5)      | 239 (17.9)                        | 460 (20.5)                         | LAMA alone                                           | 561 (7.85)       | 80 (5.99)                         | 169 (7.53)                         |
| Former Smoker                        | 5,678 (79.5)      | 1,096 (82.1)                      | 1,784 (79.5)                       | ICS alone                                            | 629 (8.80)       | 78 (5.84)                         | 158 (7.04)                         |
| <b>Body Mass Index</b>               |                   |                                   |                                    | LABA+LAMA                                            | 89 (1.25)        | 17 (1.27)                         | 24 (1.07)                          |
| Underweight (< 18.5)                 | 265 (3.71)        | 32 (2.40)                         | 53 (2.36)                          | LABA+ICS                                             | 1,764 (24.7)     | 325 (24.3)                        | 558 (24.9)                         |
| Healthy Weight (18.5-24.9)           | 2,048 (28.7)      | 354 (26.5)                        | 554 (24.7)                         | LAMA+ICS                                             | 119 (1.67)       | 26 (1.95)                         | 39 (1.74)                          |
| Overweight (25.0-29.9)               | 2,234 (31.3)      | 409 (30.6)                        | 702 (31.3)                         | Triple                                               | 1,698 (23.8)     | 458 (34.3)                        | 683 (30.4)                         |
| Obese (≥ 30)                         | 2,316 (32.4)      | 491 (36.8)                        | 863 (38.5)                         | No long-acting inhaler                               | 0                | 0                                 | 0                                  |
| Missing Data                         | 283 (3.96)        | 49 (3.67)                         | 71 (3.21)                          | <b>History of Cardiovascular Disease<sup>‡</sup></b> | 6,355 (88.9)     | 1,230 (92.1)                      | 2,028 (90.4)                       |
| <b>Index of Multiple Deprivation</b> |                   |                                   |                                    | Atrial fibrillation                                  | 2,458 (34.4)     | 615 (46.1)                        | 942 (42.0)                         |
| 1 – Most deprived                    | 998 (14.0)        | 179 (13.4)                        | 301 (13.4)                         | Hypertension                                         | 4,064 (56.9)     | 780 (58.4)                        | 1,275 (56.8)                       |
| 2                                    | 1,425 (19.9)      | 285 (21.4)                        | 436 (19.4)                         | Ischaemic heart disease                              | 3,861 (54.0)     | 813 (60.9)                        | 1,333 (59.4)                       |
| 3                                    | 1,416 (19.8)      | 278 (20.8)                        | 453 (20.2)                         | Peripheral artery disease                            | 983 (13.8)       | 196 (14.7)                        | 298 (13.3)                         |
| 4                                    | 1,635 (22.9)      | 319 (23.9)                        | 531 (23.7)                         | Stroke                                               | 1,052 (14.7)     | 200 (15.0)                        | 302 (13.5)                         |
| 5 – Least deprived                   | 1,672 (23.4)      | 274 (20.5)                        | 523 (23.3)                         | <b>Diabetes mellitus</b>                             | 1,827 (25.6)     | 418 (31.3)                        | 701 (31.2)                         |
| <b>GOLD Stage</b>                    |                   |                                   |                                    | <b>CVD medications<sup>†</sup></b>                   |                  |                                   |                                    |
| 1: Mild                              | 2,591 (36.3)      | 469 (35.1)                        | 820 (36.5)                         | ACEi                                                 | 4,104 (57.4)     | 773 (57.9)                        | 1,354 (60.3)                       |
| 2: Moderate                          | 1,531 (21.4)      | 321 (24.0)                        | 524 (23.4)                         | ARB                                                  | 1,349 (18.9)     | 342 (25.6)                        | 537 (23.9)                         |
| 3: Severe                            | 1,061 (14.9)      | 261 (19.6)                        | 385 (17.2)                         | Beta-blockers                                        | 2,030 (28.4)     | 475 (35.6)                        | 989 (44.1)                         |
| 4: Very Severe                       | 276 (3.86)        | 64 (4.79)                         | 103 (4.59)                         | Calcium channel blockers                             | 1,217 (17.0)     | 200 (15.0)                        | 263 (11.7)                         |
| Missing                              | 1,687 (23.6)      | 220 (16.5)                        | 412 (18.4)                         | Loop diuretics                                       | 4,657 (65.2)     | 1,076 (80.6)                      | 1,818 (81.0)                       |
|                                      |                   |                                   |                                    | Statins                                              | 4,186 (58.6)     | 833 (62.4)                        | 1,433 (63.9)                       |
|                                      |                   |                                   |                                    | Vasodilators                                         | 1,589 (22.2)     | 369 (27.6)                        | 584 (26.0)                         |

Table E9. Descriptive statistics for non-users, incident users, and prevalent users of mineralocorticoid receptor antagonists (MRA) at start of follow-up. Proportions may not sum to 100% due to rounding. Severity of airflow limitation using the Global Initiative for Chronic Obstructive Lung Disease (GOLD) guidelines [1]. Angiotensin converting enzyme inhibitors (ACEi). Angiotensin receptor blockers (ARB). Beta-blockers (BB). Calcium channel blockers (CCB). Interquartile range (IQR). Long-acting beta agonists (LABA). Inhaled corticosteroids (ICS). Long-acting muscarinic antagonist (LAMA). Short-acting beta agonists (SABA). Short-acting muscarinic antagonist (SAMA). <sup>†</sup>At least two prescriptions >15 days apart in the year prior to the start of follow-up. <sup>‡</sup>Prior diagnosis of ischaemic heart disease, peripheral artery disease, atrial fibrillation, hypertension, and/or stroke.

| Exposure | Adjusted Hazard Ratio (95% confidence interval) |
|----------|-------------------------------------------------|
| ACEi     | 5.38 (4.79, 6.05)                               |
| ARB      | 5.99 (5.08, 7.07)                               |
| BB       | 5.65 (4.92, 6.49)                               |
| LD       | 4.76 (4.31, 5.25)                               |
| MRA      | 6.01 (5.31, 6.80)                               |

Table E10. Adjusted hazard ratios comparing incident-use to non-use of heart failure medications. Angiotensin converting enzyme inhibitors (ACEi). Angiotensin receptor blockers (ARB). Beta-blockers (BB). Loop diuretics (LD). Mineralocorticoid receptor antagonists (MRA).

| Exposure | Adjusted Hazard Ratio (95% confidence interval) |
|----------|-------------------------------------------------|
| ACEi     | 1.11 (1.03, 1.19)                               |
| ARB      | 1.22 (1.12, 1.32)                               |
| BB       | 1.41 (1.32, 1.51)                               |
| LD       | 1.12 (1.05, 1.20)                               |
| MRA      | 1.61 (1.48, 1.74)                               |

Table E11. Adjusted hazard ratios comparing prevalent-use to non-use of heart failure medications. Angiotensin converting enzyme inhibitors (ACEi). Angiotensin receptor blockers (ARB). Beta-blockers (BB). Loop diuretics (LD). Mineralocorticoid receptor antagonists (MRA).

| Exposure | Adjusted Hazard Ratio (95% confidence interval) |
|----------|-------------------------------------------------|
| ACEi     | 0.24 (0.22, 0.27)                               |
| ARB      | 0.23 (0.20, 0.26)                               |
| BB       | 0.27 (0.25, 0.30)                               |
| LD       | 0.25 (0.23, 0.27)                               |
| MRA      | 0.32 (0.28, 0.35)                               |

Table E12. Adjusted hazard ratios comparing prevalent-use to incident-use of heart failure medications. Angiotensin converting enzyme inhibitors (ACEi). Angiotensin receptor blockers (ARB). Beta-blockers (BB). Loop diuretics (LD). Mineralocorticoid receptor antagonists (MRA).

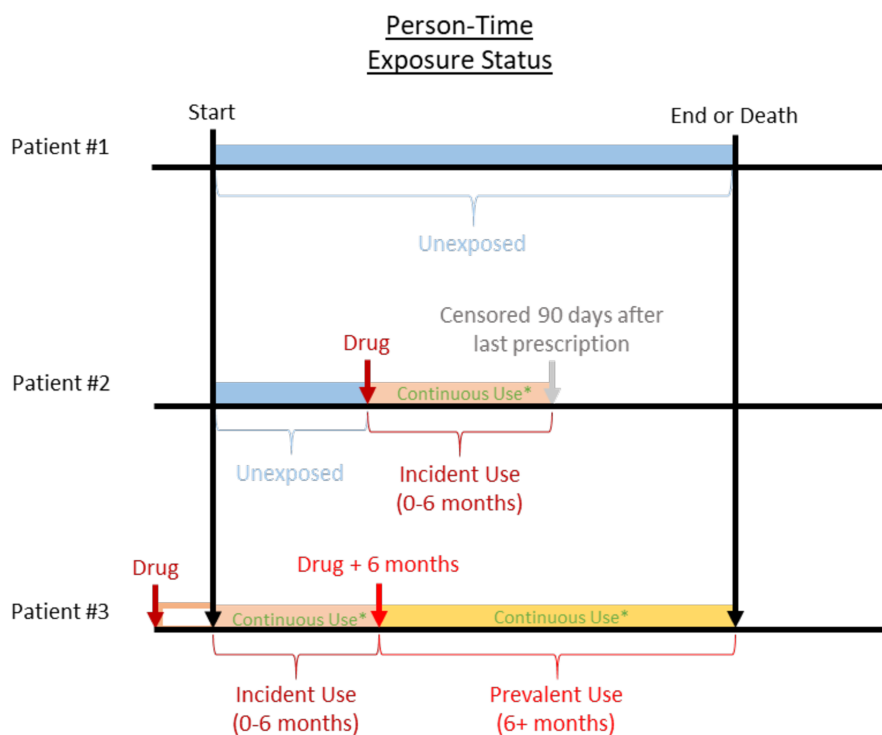

Figure E1. Example of person-time based follow-up.

**Patient #1** enters the study at their start of follow-up unexposed, they remain unexposed until their end of follow-up. **Patient #2** enters the study at their start of follow-up unexposed. They become exposed to incident drug use upon first prescription of the drug of interest and remain exposed throughout continuous use of the drug. They are censored 90 days after their last prescription within continuous use, which occurs within 6 months of their first prescription. **Patient #3** enters the study at their start of follow-up exposed to incident continuous drug use, whereby their first prescription of the drug of interest was within 6 months of their start of follow-up. They remain exposed to incident continuous drug use until 6 months after their first prescription, thereafter they are exposed to prevalent continuous drug use until their end of follow-up. \*Continuous drug use was defined as at least two prescriptions of the drug of interest and gaps between prescriptions were no more than 90 days. Patients were censored 90 days after their last prescription in a continuous run.

| <b>A) ACEi</b>     |                |                  |               | <b>B) ARB</b>   |                    |                |                  | <b>C) BB</b>  |                 |                    |                |                  |               |                 |
|--------------------|----------------|------------------|---------------|-----------------|--------------------|----------------|------------------|---------------|-----------------|--------------------|----------------|------------------|---------------|-----------------|
|                    |                | End of Follow-up |               |                 |                    |                | End of Follow-up |               |                 |                    |                | End of Follow-up |               |                 |
|                    |                | Non-User         | Incident User | Prevalent User  |                    |                | Non-User         | Incident User | Prevalent User  |                    |                | Non-User         | Incident User | Prevalent User  |
| Start of Follow-up | Non-User       | 3,497<br>(39.3)  | 213<br>(2.39) | 426<br>(4.79)   | Start of Follow-up | Non-User       | 6,851<br>(77.0)  | 99<br>(1.11)  | 303<br>(3.40)   | Start of Follow-up | Non-User       | 5,364<br>(60.3)  | 212<br>(2.38) | 585<br>(6.57)   |
|                    | Incident User  |                  | 136<br>(1.53) | 462<br>(5.19)   |                    | Incident User  |                  | 37<br>(0.42)  | 229<br>(2.57)   |                    | Incident User  |                  | 66<br>(0.74)  | 300<br>(3.37)   |
|                    | Prevalent User |                  |               | 4,167<br>(46.8) |                    | Prevalent User |                  |               | 1,382<br>(15.5) |                    | Prevalent User |                  |               | 2,374<br>(26.7) |
| <b>D) LD</b>       |                |                  |               | <b>E) MRA</b>   |                    |                |                  |               |                 |                    |                |                  |               |                 |
|                    |                | End of Follow-up |               |                 |                    |                | End of Follow-up |               |                 |                    |                |                  |               |                 |
|                    |                | Non-User         | Incident User | Prevalent User  |                    |                | Non-User         | Incident User | Prevalent User  |                    |                |                  |               |                 |
| Start of Follow-up | Non-User       | 1,884<br>(21.2)  | 430<br>(4.83) | 723<br>(8.12)   | Start of Follow-up | Non-User       | 6,231<br>(70.0)  | 325<br>(3.65) | 590<br>(6.63)   |                    |                |                  |               |                 |
|                    | Incident User  |                  | 253<br>(2.84) | 699<br>(7.85)   |                    | Incident User  |                  | 101<br>(1.13) | 319<br>(3.58)   |                    |                |                  |               |                 |
|                    | Prevalent User |                  |               | 4,912<br>(55.2) |                    | Prevalent User |                  |               | 1,335<br>(15.0) |                    |                |                  |               |                 |

Figure E2. Cardiovascular medication exposure status for chronic obstructive pulmonary disease (COPD) patients with heart failure (HF) at start and end of follow-up for A) angiotensin converting enzyme inhibitors (ACEi), (B) angiotensin receptor blockers (ARB), (C) beta-blockers (BB), (D) LDs (LD), and (E) mineralocorticoid receptor antagonists (MRA). Population size: N = 8,901. Count (%).

## References

1. GOLD. Global Strategy for the Diagnosis, Management and Prevention of COPD, Global Initiative for Chronic Obstructive Lung Disease (GOLD) 2017. [Webpage] 2017 [cited 10 Jan 2018]; Available from: <http://goldcopd.org/gold-2017-global-strategy-diagnosis-management-prevention-copd/>
